# Supplementary material for: Geosites and Geotourism in the Local Development of Communities of the Andes Mountains. A Case Study
Source: MDPI journal article supplement (doi:10.3390/su13094624), 2021-04-21
Supplement: s1 [file s1]

# SUPPLEMENTARY MATERIALS

Article

## Geosites and Geotourism in the Local Development of Communities of the Andes Mountains. A Case Study.

Supplementary Materials:

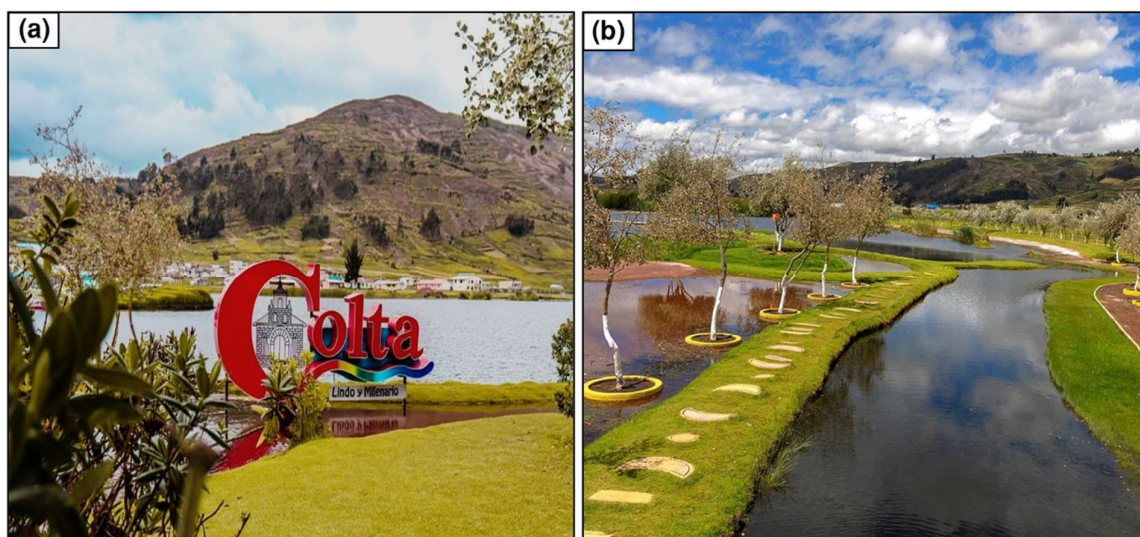

**Figure S1.** One of the most visited geosites in the province of Chimborazo: (a) “Colta” lagoon front landscape; (b) Side landscape.

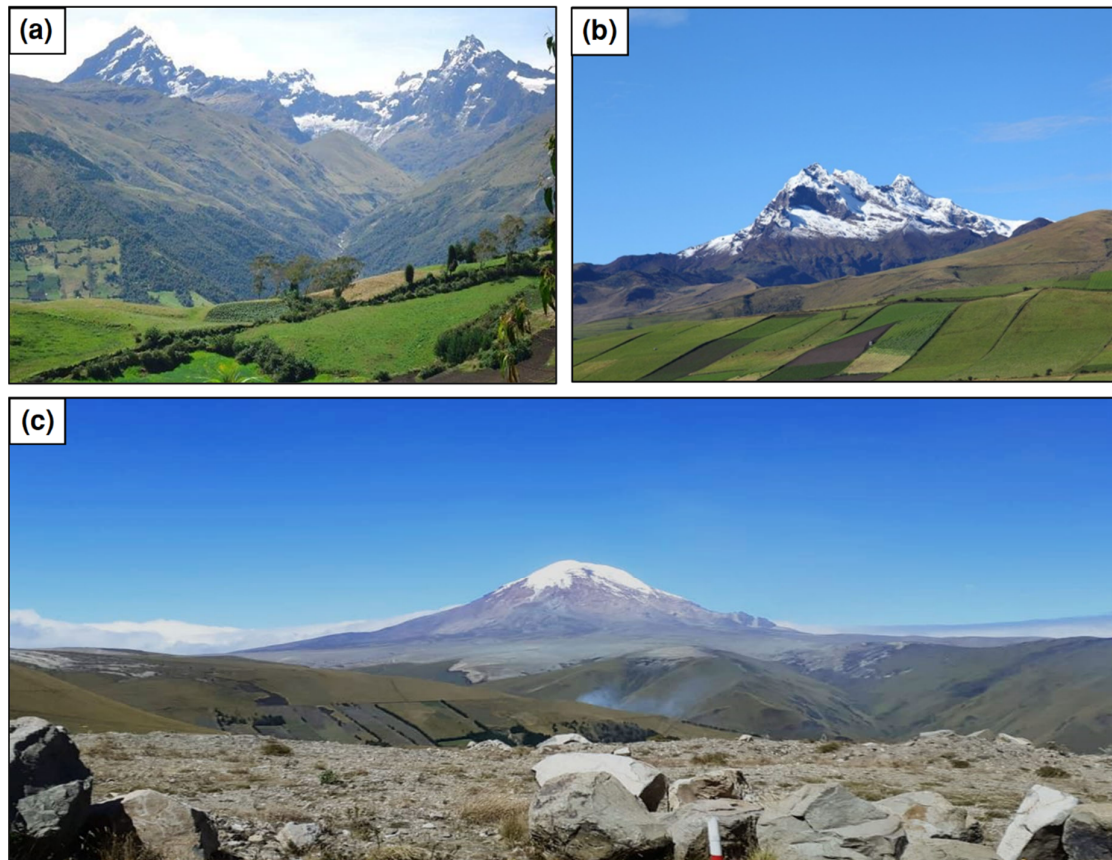

**Figure S2.** Three main geoforms of the Chimborazo province: (a) Volcán El Altar; (b) Volcán Carihuairazo; (c) Volcán Chimborazo.

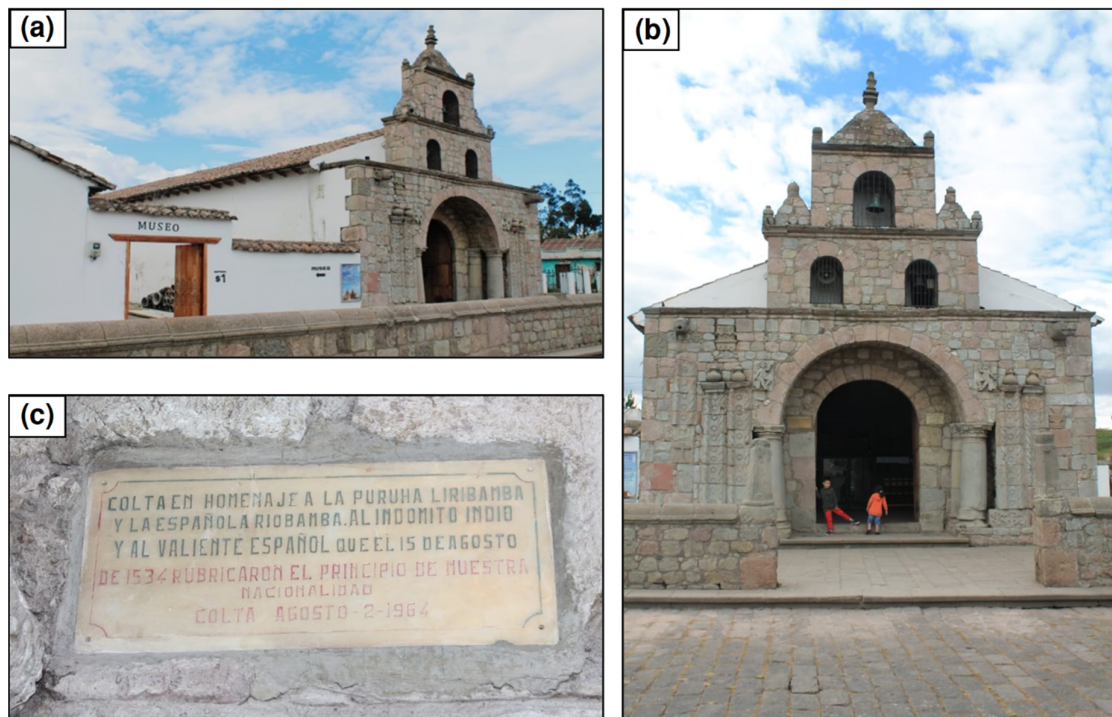

**Figure S3.** Representative site of the Chimborazo province: (a) Lateral part of the "Iglesia Balbanera"; (b) Relic of the church; (c) Front and striking part of the church.
